# Supplementary material
Source: PubMed Central journal article supplement (PMC3416476)
Supplement: supp_80.7.2390_IAI-IAI00144-12-s01.pdf [file supp_80.7.2390_IAI-IAI00144-12-s01.pdf]

**Table S1-** Strains and plasmids used in this study.

| Strain                      | Characteristics                                           | Source         |
|-----------------------------|-----------------------------------------------------------|----------------|
| <i>F. tularensis</i> LVS    | Attenuated <i>F. tularensis</i> vaccine strain            | CBER/FDA       |
| LVS $\Delta$ <i>fptA</i>    | LVS deletion of FTT_0104c                                 | This study     |
| LVS $\Delta$ <i>fptB</i>    | LVS deletion of FTT_0056c                                 | This study     |
| LVS $\Delta$ <i>fptC</i>    | LVS deletion of FTT_0671                                  | This study     |
| LVS $\Delta$ <i>fptD</i>    | LVS deletion of FTT_0053                                  | This study     |
| LVS $\Delta$ <i>fptE</i>    | LVS deletion of FTT_0129                                  | This study     |
| LVS $\Delta$ <i>fptF</i>    | LVS deletion of FTT_0127c                                 | This study     |
| LVS $\Delta$ <i>fptG</i>    | LVS deletion of FTT_1291                                  | This study     |
| LVS $\Delta$ <i>fptH</i>    | LVS deletion of FTT_0488c                                 | This study     |
| LVS $\Delta$ <i>fptI</i>    | LVS deletion of FTT_0708                                  | This study     |
| <i>fptB</i> Comp            | <i>Trans</i> -complement of $\Delta$ <i>fptB</i>          | This study     |
| <i>fptE</i> Comp            | <i>Trans</i> -complement of $\Delta$ <i>fptE</i>          | This study     |
| <i>fptG</i> Comp            | <i>Trans</i> -complement of $\Delta$ <i>fptG</i>          | This study     |
| Plasmid                     | Characteristics                                           | Source         |
| pFT893                      | Base <i>F. tularensis</i> suicide plasmid                 | Lab collection |
| pFT893 $\Delta$ <i>fptA</i> | Suicide plasmid for FTT_0104c                             | This study     |
| pFT893 $\Delta$ <i>fptB</i> | Suicide plasmid for FTT_0056c                             | This study     |
| pFT893 $\Delta$ <i>fptC</i> | Suicide plasmid for FTT_0671                              | This study     |
| pFT893 $\Delta$ <i>fptD</i> | Suicide plasmid for FTT_0053                              | This study     |
| pFT893 $\Delta$ <i>fptE</i> | Suicide plasmid for FTT_0129                              | This study     |
| pFT893 $\Delta$ <i>fptF</i> | Suicide plasmid for FTT_0127c                             | This study     |
| pFT893 $\Delta$ <i>fptG</i> | Suicide plasmid for FTT_1291                              | This study     |
| pFT893 $\Delta$ <i>fptH</i> | Suicide plasmid for FTT_0488c                             | This study     |
| pFT893 $\Delta$ <i>fptI</i> | Suicide plasmid for FTT_0708                              | This study     |
| pFT906                      | Base <i>F. tularensis</i> complementation plasmid         | Lab collection |
| pFT906 <i>fptB</i>          | <i>Trans</i> -complement plasmid for $\Delta$ <i>fptB</i> | This study     |
| pFT906 <i>fptE</i>          | <i>Trans</i> -complement plasmid for $\Delta$ <i>fptE</i> | This study     |
| pFT906 <i>fptG</i>          | <i>Trans</i> -complement plasmid for $\Delta$ <i>fptG</i> | This study     |
