# Supplementary material
Source: PubMed Central journal article supplement (PMC3416476)
Supplement: supp_80.7.2390_IAI-IAI00144-12-s02.pdf [file supp_80.7.2390_IAI-IAI00144-12-s02.pdf]

**Table S2.** Primers used in this study.

| Primer                    | Sequence                                                 | Function                     |
|---------------------------|----------------------------------------------------------|------------------------------|
| Ft <i>fptB</i> UpDel5     | CGCGGATCCAGATCTGTGCGACCCCTTTT<br>GAACAAGATAGGCAC         | <i>fptB</i> deletion         |
| Ft <i>fptB</i> UpDel3     | GCGATTTGAGATGCCAGGAGTTAGGGTA<br>GTATG                    | <i>fptB</i> deletion         |
| Ft <i>fptB</i> DownDel5   | CTCCTGGCATCTCAAATCGCGAATCTAA<br>TGCTGC                   | <i>fptB</i> deletion         |
| Ft <i>fptB</i> DownDel3   | CGCGGATCCAGATCTGTGCGACGGCCAAC<br>GCGTTGTTAAAGTTG         | <i>fptB</i> deletion         |
| Ft <i>fptB</i> UpExternal | TAGGATCAGCAGTAGGAACAACCTCT                               | Confirm <i>fptB</i> deletion |
| Ft <i>fptB</i> DnExternal | CGGACTATAAGTCGGTTAAATGATATGC                             | Confirm <i>fptB</i> deletion |
| Ft <i>fptE</i> UpDel5     | CGCGGATCCGTCGACGATGCTTATACAA<br>GCTCAACTAGTC             | <i>fptE</i> deletion         |
| Ft <i>fptE</i> UpDel3     | TAAAGCATACGCTCAAAAAGCCAGAAT<br>ATGTAAATAC                | <i>fptE</i> deletion         |
| Ft <i>fptE</i> DownDel5   | CTTTTTGAGCGTATGCTTTAGCTATCCTT<br>CCAGTA                  | <i>fptE</i> deletion         |
| Ft <i>fptE</i> DownDel3   | CGCGGATCCGTCGACTACGCATCTACAA<br>CCAGACCAGTA              | <i>fptE</i> deletion         |
| Ft <i>fptE</i> UpExternal | CTTGATACGCACCTGTAAGTATTCTC                               | Confirm <i>fptE</i> deletion |
| Ft <i>fptE</i> DnExternal | CTGCCATGCGATAGTGGTCAATAAACC                              | Confirm <i>fptE</i> deletion |
| Ft <i>fptG</i> UpDel5     | CGCGGATCCAGATCTGTGCGACTATACAG<br>TTCATAAGCTGGGCTGATGCTCC | <i>fptG</i> deletion         |
| Ft <i>fptG</i> UpDel3     | AATTGTCTCAGTGGCTCAAGTATATATA<br>TACCTTTACCAT             | <i>fptG</i> deletion         |
| Ft <i>fptG</i> DownDel5   | CTTGAGCCACTGAGACAATTTAGTGCAC<br>TGTAAT                   | <i>fptG</i> deletion         |
| Ft <i>fptG</i> DownDel3   | CGCGGATCCAGATCTGTGCGACCTATCCT<br>AATGCTAACCATTATTGTTGGGC | <i>fptG</i> deletion         |
| Ft <i>fptG</i> UpExternal | CCCACGCTGTGAGACTGATA                                     | Confirm <i>fptG</i> deletion |
| Ft <i>fptG</i> DnExternal | TGAGCATTACGTGCCAAGAG                                     | Confirm <i>fptG</i> deletion |
| FT893Kan                  | CGGTATCGCCGCTCCCGATTCGCAGCGC<br>ATCGCC                   | Confirm co-integration       |
| FT893Sac                  | GTGAACGGCAGGTATATGTGATGGG                                | Confirm co-integration       |
| Ft <i>fptB</i> CompFor    | GCTCTAGAGCATGGAACAAAGGATATA<br>C                         | <i>fptB</i> complementation  |
| Ft <i>fptB</i> CompRev    | GGAATTCCATATGGAATTCCCGCGATTT<br>GAGAAATTTATCCAGAG        | <i>fptB</i> complementation  |
| Ft <i>fptE</i> CompFor    | TCCCCGGGGGATTGAGCATAATCTTGA<br>GATATCTA                  | <i>fptE</i> complementation  |
| Ft <i>fptE</i> CompRev    | GGAATTCCATATGGAATTCCGTATATTG<br>TTAAAGGATATTTTAG         | <i>fptE</i> complementation  |
| Ft <i>fptG</i> CompFor    | CGCGGATCCAGATCTGTGCGACTATACAG<br>TTCATAAGCTGGGCTGATGCTCC | <i>fptG</i> complementation  |

|                        |                                     |                                |
|------------------------|-------------------------------------|--------------------------------|
| Ft <i>fptG</i> CompRev | GGGGTACCCACAGTGC ACTAAATTGTC<br>TCA | <i>fptG</i> complementation    |
| Ft <i>fptA</i> Forward | GTCCTAGTTACATTGTCTTGG               | Confirm <i>fptA</i> expression |
| Ft <i>fptA</i> Reverse | GTAAGGATATAACCGACAAGTGG             | Confirm <i>fptA</i> expression |
| Ft <i>fptB</i> Forward | TATACGTGGCTACGCATGGAT               | Confirm <i>fptB</i> expression |
| Ft <i>fptB</i> Reverse | GATGAAAGCAGCTACAGTTGCAG             | Confirm <i>fptB</i> expression |
| Ft <i>fptC</i> Forward | GTCTAGTCATAGGTTGGAGTA               | Confirm <i>fptC</i> expression |
| Ft <i>fptC</i> Reverse | GCAGTAGCCTTAATCTGCGGT               | Confirm <i>fptC</i> expression |
| Ft <i>fptD</i> Forward | GGGCTATGCTTGGATTGTAGTTGG            | Confirm <i>fptD</i> expression |
| Ft <i>fptD</i> Reverse | GCATGATGATATGCATTTAATATGG           | Confirm <i>fptD</i> expression |
| Ft <i>fptE</i> Forward | CTCGATCGCACCATATAACCT               | Confirm <i>fptE</i> expression |
| Ft <i>fptE</i> Reverse | GCAACATTAATACTGGAAGGATAGC           | Confirm <i>fptE</i> expression |
| Ft <i>fptF</i> Forward | CAGGTGCGTATCAAGAACAAATAG            | Confirm <i>fptF</i> expression |
| Ft <i>fptF</i> Reverse | GTGATCGCCACTATCAGCGAG               | Confirm <i>fptF</i> expression |
| Ft <i>fptG</i> Forward | GGGTGCCCAACCAGGTATGCGTGTC           | Confirm <i>fptG</i> expression |
| Ft <i>fptG</i> Reverse | GCGGGGCTAACCCAGCGCCAAC              | Confirm <i>fptG</i> expression |
| Ft <i>fptH</i> Forward | CCTTATGGATATCTTATAGATTC             | Confirm <i>fptH</i> expression |
| Ft <i>fptH</i> Reverse | GATACACGGATACACCACGAA               | Confirm <i>fptH</i> expression |
| Ft <i>fptI</i> Forward | GAGCTATGACCGTTAGACAGAC              | Confirm <i>fptI</i> expression |
| Ft <i>fptI</i> Reverse | TGTAGCTCTATCTGTAGCAGA               | Confirm <i>fptI</i> expression |
